# Supplementary figures and images for: Circulating Exosomes Inhibit B Cell Proliferation and Activity
Source: MDPI journal article supplement (doi:10.3390/cancers12082110), 2020-07-29

A

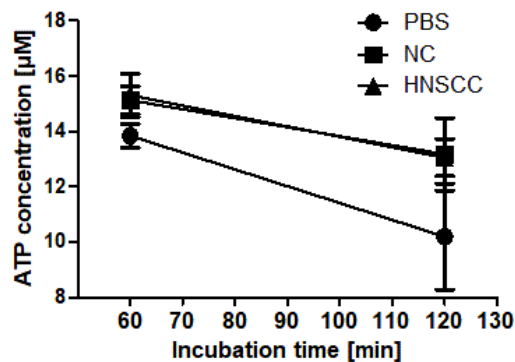

B

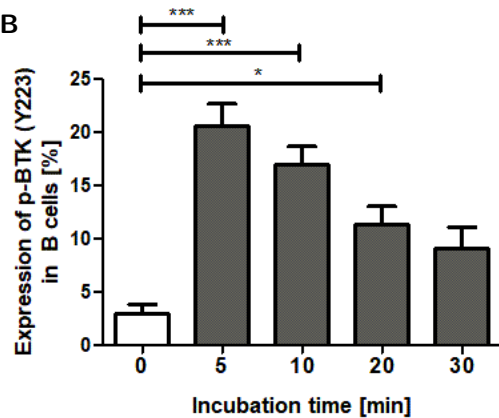

C

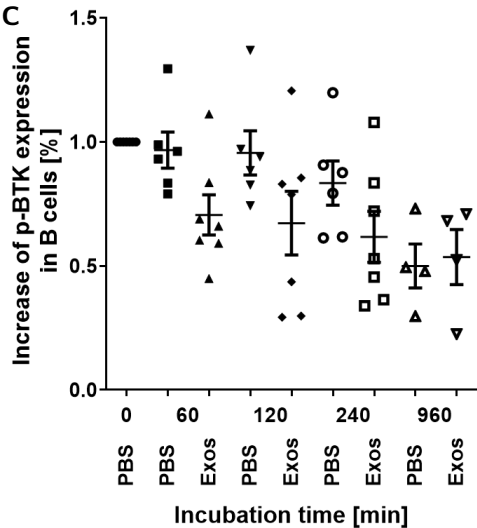

Increase of p-BTK expression in B cells [%]

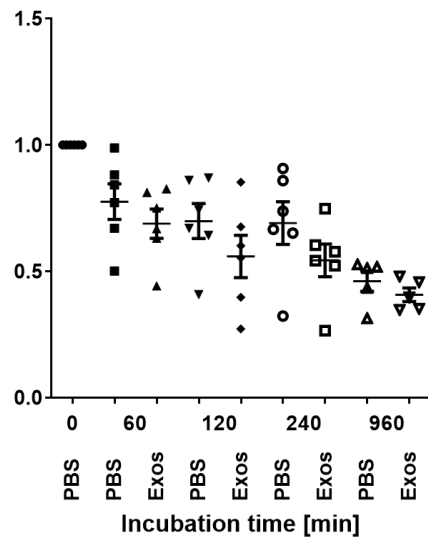

Supplement: s1 [file s1]

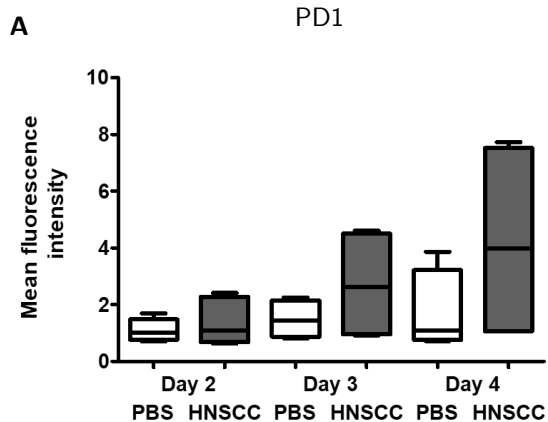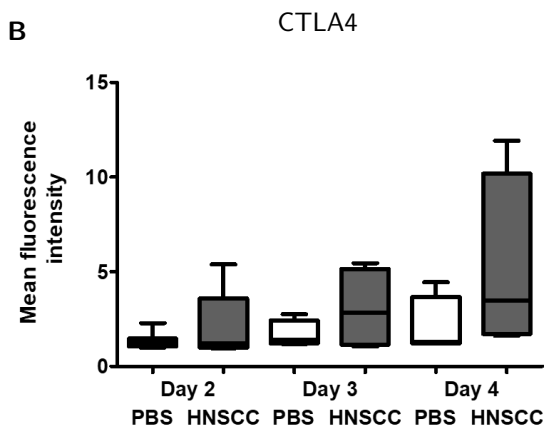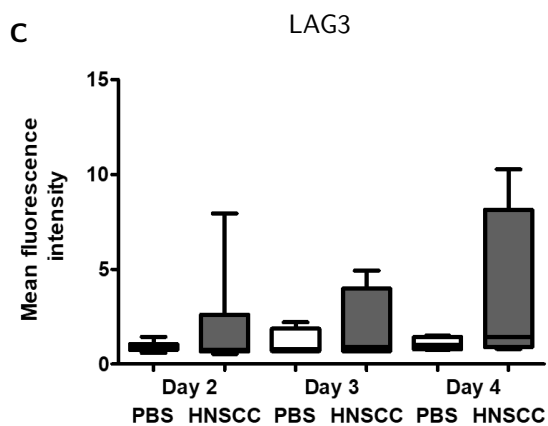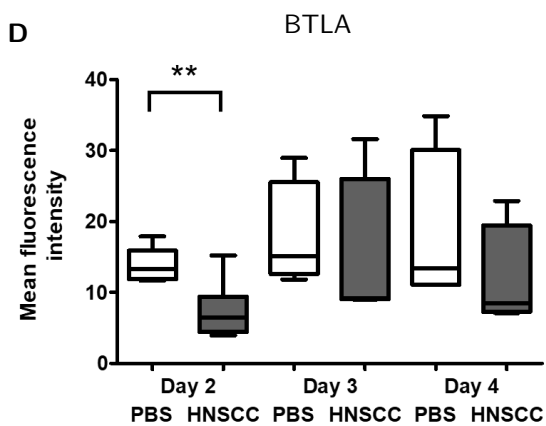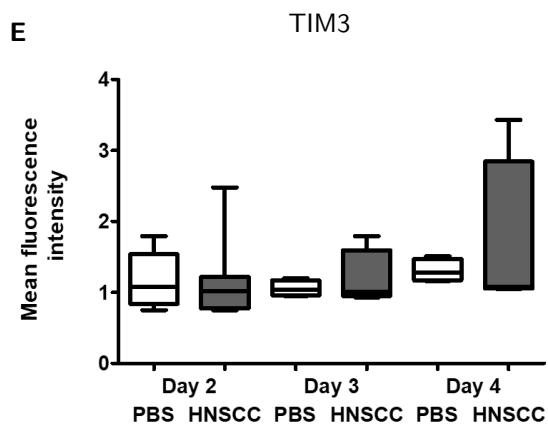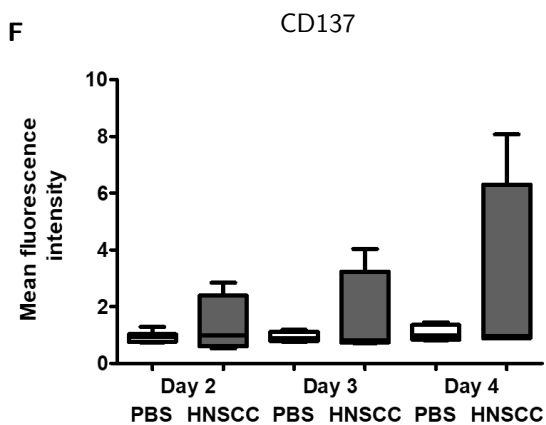

Supplement: s1 [file s1]

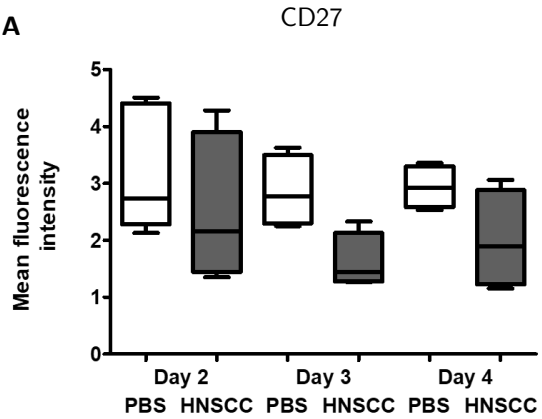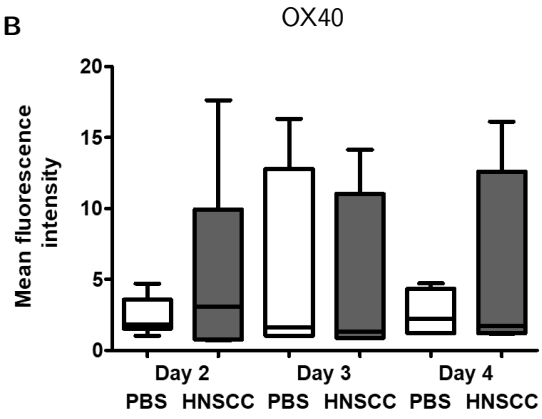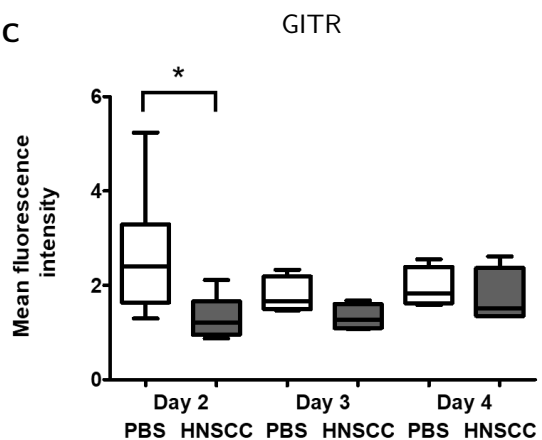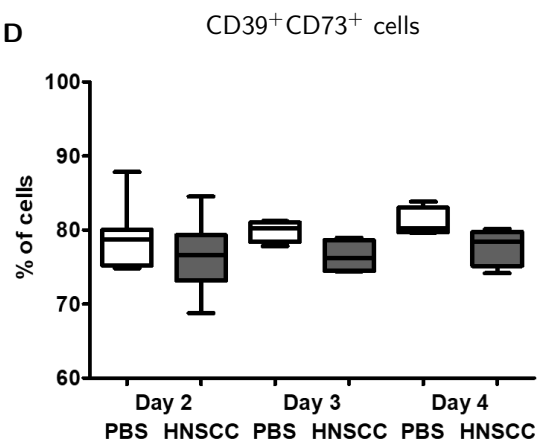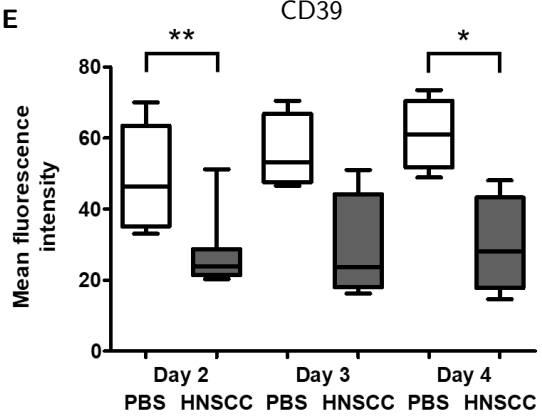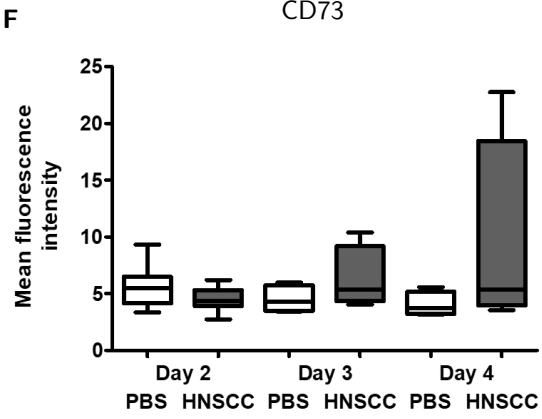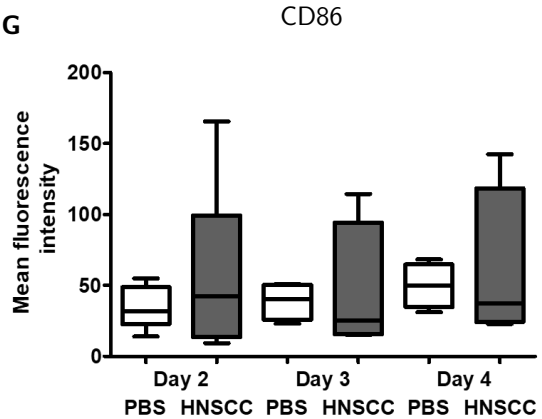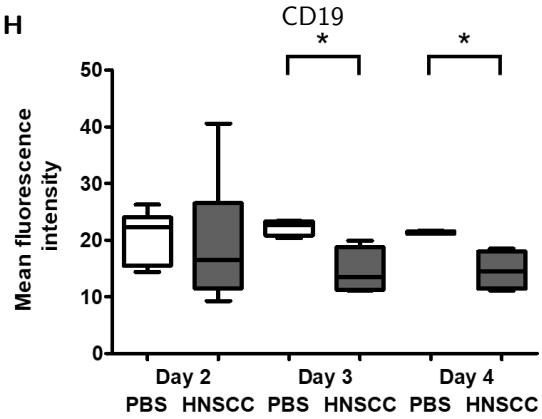

Supplement: s1 [file s1]
